# Supplementary material for: Multicomponent domino reactions: borax catalyzed synthesis of highly functionalised pyran-annulated heterocycles
Source: Royal Society of Chemistry journal article supplement (doi:10.1039/c3ra43514h), 2013-01-01

## Supporting Information

### **Multicomponent domino reactions: Borax catalyzed synthesis of highly functionalised pyran-annulated heterocycles**

**Aniruddha Molla,<sup>a</sup> Ezaz Hossain<sup>a</sup> and Sahid Hussain<sup>\*a</sup>**

*Department of Chemistry, Indian Institute of Technology Patna, Patna 800 013, India*

\* Corresponding author. Tel.: +91-612-255-2022; fax: +91-612-227-7383;  
e-mail: [sahid@iitp.ac.in](mailto:sahid@iitp.ac.in)

|                                                                               |       |
|-------------------------------------------------------------------------------|-------|
| Title page                                                                    | 1     |
| Experimental General                                                          | 2     |
| Spectral data of all compounds                                                | 3-12  |
| Copies of <sup>1</sup> H and <sup>13</sup> C NMR spectra of Unknown Compounds | 13-15 |

## **General Experimental procedure:**

### **General**

All reagents were purchased either from Sigma or Merck. Solvents were dried and purified using standard techniques. Melting points were recorded on a SRS-EZ-Melt melting point apparatus and are uncorrected. IR spectra were recorded in KBr on a Shimadzu IR Afinity I.  $^1\text{H}$  NMR spectra and  $^{13}\text{C}$  NMR spectra were recorded on a Bruker 300 MHz, 500 MHz, Jeol 400 MHz and Varian 400 MHz spectrometer in  $\text{CDCl}_3$  or  $\text{DMSO-d}^6$  using TMS as an internal reference and chemical shifts are reported in parts per million (ppm).  $^1\text{H}$  NMR Spectra are reported in the order : no of protons, multiplicity as s (singlet), d (doublet), t (triplet), m (multiplet), brs (broad singlet) and coupling constant (J value) in hertz (Hz).

### **Typical experimental procedure**

To alkyl nitriles (1.1 mmol) (malononitrile or ethyl cyano acetate) dissolved in ethanol (2 mL) was added an aldehyde (1.0 mmol) followed by borax (10 mol %) and an active methylenic diketo compound (1.0mmol) (4-hydroxy coumarin or dimedone or cycloalkan-1,3-dione) were added to the same reaction mixture under reflux condition [In case of 1,3 ketoester (1.0mmol) the substrate (MAA or EAA) was added at room temperature or under sonication]. The progress of the reaction was monitored by TLC and after completion of the reaction the solid precipitate was filtered off to get the corresponding product.

## Spectral data of Compounds

### ***2-amino-4-(4-chlorophenyl)-5-oxo-4,5-dihydropyrano[3,2-c]chromene-3-carbonitrile***

#### ***(Table 1, entry 1)***

Yield 88%. Solid, m.p. 260°C. IR  $\nu_{\max}$  (KBr): 3382, 3311, 3259, 3189, 2193, 1715, 1676, 1611, 1377, 1961  $\text{cm}^{-1}$ .  $^1\text{H}$  NMR (400 MHz, DMSO- $d_6$ ):  $\delta$  = 4.51 (s, 1H), 7.12 (s, 2H), 7.29 (brs, 4H), 7.35 (d,  $J$  = 8.4 Hz, 1H), 7.41 (t,  $J$  = 7.6 Hz, 1H), 7.64 (t,  $J$  = 7.6 Hz, 1H), 7.95 (d,  $J$  = 7.6 Hz, 1H) ppm.

### ***2-amino-5-oxo-4-p-tolyl-4,5-dihydropyrano[3,2-c]chromene-3-carbonitrile (Table 2, entry 1)***

Yield 80%. Solid, m.p. 256°C. IR  $\nu_{\max}$  (KBr): 3387, 3294, 3192, 3036, 2225, 1715, 1672, 1588, 1352, 1095  $\text{cm}^{-1}$ .  $^1\text{H}$  NMR (400 MHz, DMSO- $d_6$ ):  $\delta$  = 2.45 (s, 3H), 4.45 (s, 1H), 7.09 (s, 2H), 7.34-7.38 (m, 4H), 7.59-7.64 (m, 1H), 7.87 (d,  $J$  = 8.0 Hz, 2H), 7.97-8.00 (m, 1H) ppm.

### ***2-amino-5-oxo-4-phenyl-4,5-dihydropyrano[3,2-c]chromene-3-carbonitrile (Table 2, entry 2)***

Yield 79%. Solid, m.p. 270°C. IR  $\nu_{\max}$  (KBr): 3377, 3286, 3179, 2198, 1708, 1676, 1605, 1381, 1211, 1058  $\text{cm}^{-1}$ .  $^1\text{H}$  NMR (400 MHz, DMSO- $d_6$ ):  $\delta$  = 4.49 (s, 1H), 7.09 (s, 2H), 7.27-7.31 (m, 4H), 7.35 (d,  $J$  = 7.6 Hz, 1H), 7.41 (t,  $J$  = 7.2 Hz, 1H), 7.64 (t,  $J$  = 7.6 Hz, 1H), 7.95-7.96 (m, 2H) ppm.

### ***2-amino-4-(4-methoxyphenyl)-5-oxo-4,5-dihydropyrano[3,2-c]chromene-3-carbonitrile***

#### ***(Table 2, entry 3)***

Yield 84%. Solid, m.p. 250°C. IR  $\nu_{\max}$  (KBr): 3385, 3319, 3190, 2225, 1708, 1671, 1606, 1371, 1022  $\text{cm}^{-1}$ .  $^1\text{H}$  NMR (400 MHz, DMSO- $d_6$ ):  $\delta$  = 3.76 (s, 3H), 4.44 (s, 1H), 6.82-6.84 (m, 2H), 7.04-7.08 (m, 2H), 7.20 (d,  $J$  = 8.8 Hz, 2H), 7.33-7.42 (m, 2H), 7.93-7.99 (m, 2H) ppm.

***2-amino-4-(4-nitrophenyl)-5-oxo-4,5-dihydropyrano[3,2-c]chromene-3-carbonitrile (Table 2, entry 4)***

Yield 79%. Solid, m.p. 260°C. IR  $\nu_{\max}$  (KBr): 3482, 3429, 3370, 3334, 2195, 1718, 1670, 1607, 1377, 1055  $\text{cm}^{-1}$ .  $^1\text{H}$  NMR (500 MHz, DMSO- $d_6$ ):  $\delta$  = 4.69 (s, 1H), 7.47-7.53 (m, 2H), 7.55 (s, 2H), 7.60 (d,  $J$  = 8.5 Hz, 2H), 7.72-7.76 (m, 1H), 7.91-7.93 (m, 1H), 8.19 (d,  $J$  = 9.0 Hz, 2H) ppm.

***2-amino-4-(3-nitrophenyl)-5-oxo-4,5-dihydropyrano[3,2-c]chromene-3-carbonitrile (Table 2, entry 5)***

Yield 76%. Solid, m.p. 260°C. IR  $\nu_{\max}$  (KBr): 3403, 3323, 3216, 2203, 1704, 1668, 1607, 1382, 1058  $\text{cm}^{-1}$ .  $^1\text{H}$  NMR (500 MHz, DMSO- $d_6$ ):  $\delta$  = 4.74 (s, 1H), 7.46-7.52 (m, 2H), 7.55 (s, 2H), 7.64 (t,  $J$  = 7.5 Hz, 1H), 7.72-7.76 (m, 1H), 7.82 (d,  $J$  = 7.5 Hz, 1H), 7.93 (d,  $J$  = 8.0 Hz, 1H) 8.13 (d,  $J$  = 8.5 Hz, 2H) ppm.

***ethyl 2-amino-4-(4-nitrophenyl)-5-oxo-4,5-dihydropyrano[3,2-c]chromene-3-carboxylate (Table 2, entry 6)***

Yield 82%. Solid, m.p. 240°C. IR  $\nu_{\max}$  (KBr): 3441, 3325, 3066, 2976, 1719, 1685, 1612, 1534, 1378, 1279, 1201, 1093  $\text{cm}^{-1}$ .  $^1\text{H}$  NMR (400 MHz, DMSO- $d_6$ ):  $\delta$  = 1.10 (t,  $J$  = 7.0 Hz, 3H), 3.97-4.01 (m, 2H), 4.82 (s, 1H), 7.45 (d,  $J$  = 8.0 Hz, 1H), 7.49-7.55 (m, 3H), 7.69-7.73 (m, 1H), 7.96-8.01 (m, 3H), 8.12 (d,  $J$  = 8.5 Hz, 2H) ppm.

***ethyl 2-amino-4-(3-nitrophenyl)-5-oxo-4,5-dihydropyrano[3,2-c]chromene-3-carboxylate (Table 2, entry 7)***

Yield 72%. Solid, m.p. 245°C. IR  $\nu_{\max}$  (KBr): 3435, 3316, 2992, 1727, 1691, 1658, 1530, 1455, 1377, 1273, 1090  $\text{cm}^{-1}$ .  $^1\text{H}$  NMR (500 MHz, DMSO- $d_6$ ):  $\delta$  = 1.09 (t,  $J$  = 7.0 Hz, 3H), 3.96-4.01 (m, 2H), 4.82 (s, 1H), 7.45 (d,  $J$  = 8.5 Hz, 1H), 7.49-7.52 (m, 1H), 7.54-7.57 (m, 1H), 7.69-7.73 (m, 2H), 7.95-8.01 (m, 3H), 8.03-8.07 (m, 2H) ppm.

***2-amino-5-oxo-4-(thiophen-2-yl)-4,5-dihydropyrano[3,2-c]chromene-3-carbonitrile (Table 2, entry 8)***

Yield 70%. Solid, m.p. 220°C. IR  $\nu_{\max}$  (KBr): 3367, 3280, 3174, 2200, 1710, 1669, 1636, 1601, 1383, 1360, 1171, 1056  $\text{cm}^{-1}$ .  $^1\text{H}$  NMR (400 MHz, DMSO- $d_6$ ):  $\delta$  = 4.83 (s, 1H), 6.93-6.95 (m, 1H), 7.04 (d,  $J$  = 3.2, 1H), 7.32 (d,  $J$  = 4.0 Hz, 1H), 7.39-7.45 (m, 4H), 7.65-7.69 (m, 1H), 7.89-7.91 (m, 1H) ppm.

***2-amino-7,7-dimethyl-5-oxo-4-phenyl-5,6,7,8-tetrahydro-4H-chromene-3-carbonitrile (Table 3, entry 1)***

Yield 79%. Solid, m.p. 230°C. IR  $\nu_{\max}$  (KBr): 3397, 3324, 3212, 2960, 2200, 1679, 1661, 1604, 1467, 1371, 1036  $\text{cm}^{-1}$ .  $^1\text{H}$  NMR (400 MHz,  $\text{CDCl}_3$ ):  $\delta$  = 1.04 (s, 3H), 1.11 (s, 3H), 2.21-2.23 (m, 2H), 2.45 (brs, 2H), 4.40 (s, 1H), 4.57 (brs, 2H), 7.17-7.31 (m, 5H) ppm.

***2-amino-4-(4-chlorophenyl)-7,7-dimethyl-5-oxo-5,6,7,8-tetrahydro-4H-chromene-3-carbonitrile (Table 3, entry 2)***

Yield 82%. Solid, m.p. 210°C. IR  $\nu_{\max}$  (KBr): 3381, 3183, 2959, 2188, 1677, 1635, 1603, 1489, 1366, 1139, 1032  $\text{cm}^{-1}$ .  $^1\text{H}$  NMR (400 MHz,  $\text{CDCl}_3$ ):  $\delta$  = 1.03 (s, 3H), 1.11 (s, 3H), 2.21-2.23 (m, 2H), 2.45 (brs, 2H), 4.39 (s, 1H), 4.60 (brs, 2H), 7.16-7.19 (m, 2H), 7.25-7.27 (m, 2H) ppm.

***2-amino-4-(4-bromophenyl)-7,7-dimethyl-5-oxo-5,6,7,8-tetrahydro-4H-chromene-3-carbonitrile (Table 3, entry 3)***

Yield 80%. Solid, m.p. 205°C. IR  $\nu_{\max}$  (KBr): 3395, 3320, 3212, 2965, 2192, 1684, 1660, 1607, 1408, 1369, 1040  $\text{cm}^{-1}$ .  $^1\text{H}$  NMR (400 MHz,  $\text{CDCl}_3$ ):  $\delta$  = 1.03 (s, 3H), 1.11 (s, 3H), 2.21-2.23 (m, 2H), 2.45 (brs, 2H), 4.37 (s, 1H), 4.54 (brs, 2H), 7.12 (d,  $J$  = 8.4 Hz, 2H), 7.41 (d,  $J$  = 8.4 Hz, 2H) ppm.

***2-amino-4-(4-methoxyphenyl)-7,7-dimethyl-5-oxo-5,6,7,8-tetrahydro-4H-chromene-3-carbonitrile (Table 3, entry 4)***

Yield 81%. Solid, m.p. 199°C. IR  $\nu_{\max}$  (KBr): 3379, 3307, 3185, 2965, 2188, 1690, 1646, 1607, 1464, 1365, 1034  $\text{cm}^{-1}$ .  $^1\text{H}$  NMR (400 MHz,  $\text{CDCl}_3$ ):  $\delta$  = 1.03 (s, 3H), 1.11 (s, 3H), 2.21-2.23 (m, 2H), 2.44 (s, 2H), 3.76 (s, 3H), 4.36 (s, 1H), 4.51 (brs, 2H), 6.82 (d,  $J$  = 8.8 Hz, 2H), 7.15 (d,  $J$  = 8.8 Hz, 2H) ppm.

***2-amino-7,7-dimethyl-5-oxo-4-p-tolyl-5,6,7,8-tetrahydro-4H-chromene-3-carbonitrile (Table 3, entry 5)***

Yield 80%. Solid, m.p. 212°C. IR  $\nu_{\max}$  (KBr): 3426, 3331, 3221, 2958, 2192, 1678, 1638, 1601, 1510, 1368, 1033  $\text{cm}^{-1}$ .  $^1\text{H}$  NMR (400 MHz,  $\text{CDCl}_3$ ):  $\delta$  = 1.04 (s, 3H), 1.11 (s, 3H), 2.21-2.23 (m, 2H), 2.29 (s, 3H), 2.49 (brs, 2H), 4.36 (s, 1H), 4.50 (brs, 2H), 7.08-7.13 (m, 2H) ppm.

***2-amino-7,7-dimethyl-4-(4-nitrophenyl)-5-oxo-5,6,7,8-tetrahydro-4H-chromene-3-carbonitrile (Table 3, entry 6)***

Yield 79%. Solid, m.p. 175°C. IR  $\nu_{\max}$  (KBr): 3408, 3117, 3174, 2973, 2182, 1672, 1628, 1591, 1465, 1348  $\text{cm}^{-1}$ .  $^1\text{H}$  NMR (400 MHz,  $\text{CDCl}_3$ ):  $\delta$  = 1.04 (s, 3H), 1.13 (s, 3H), 2.17-2.29 (m, 2H), 2.48-2.49 (m, 2H), 4.52 (s, 1H), 4.69 (brs, 2H), 7.43 (d,  $J$  = 8.8 Hz, 2H), 8.17 (d,  $J$  = 8.8 Hz, 2H) ppm.

***2-amino-7,7-dimethyl-4-(2-nitrophenyl)-5-oxo-5,6,7,8-tetrahydro-4H-chromene-3-carbonitrile (Table 3, entry 7)***

Yield 75%. Solid, m.p. 215°C. IR  $\nu_{\max}$  (KBr): 3472, 3334, 3185, 2961, 2194, 1690, 1664, 1596, 1469, 1373, 1042  $\text{cm}^{-1}$ .  $^1\text{H}$  NMR (400 MHz,  $\text{CDCl}_3$ ):  $\delta$  = 0.98 (s, 3H), 1.08 (s, 3H), 2.08-2.22 (m, 2H), 2.44-2.45 (m, 2H), 4.71 (brs, 1H), 5.18 (s, 1H), 7.30-7.36 (m, 2H), 7.48-7.54 (m, 1H), 7.79 (d,  $J$  = 8.4 Hz, 1H) ppm.

***2-amino-4-(4-hydroxyphenyl)-7,7-dimethyl-5-oxo-5,6,7,8-tetrahydro-4H-chromene-3-carbonitrile (Table 3, entry 8)***

Yield 70%. Solid, m.p. 215°C. IR  $\nu_{\max}$  (KBr): 3419, 3352, 3168, 2965, 2192, 1683, 1641, 1603, 1452, 1374, 1039  $\text{cm}^{-1}$ .  $^1\text{H}$  NMR (400 MHz,  $\text{CDCl}_3$ ):  $\delta$  = 1.03 (s, 3H), 1.05 (s, 3H), 2.29 (s, 2H), 2.44 (s, 2H), 4.35 (s, 1H), 4.48 (s, 2H), 4.72 (s, 1H), 6.74 (d,  $J$  = 7.6 Hz, 2H), 7.10 (d,  $J$  = 8.4 Hz, 2H) ppm.

***2-amino-7,7-dimethyl-5-oxo-4-(thiophen-2-yl)-5,6,7,8-tetrahydro-4H-chromene-3-carbonitrile (Table 3, entry 9)***

Yield 68%. Solid, m.p. 210°C. IR  $\nu_{\max}$  (KBr): 3382, 3248, 2959, 2199, 1680, 1660, 1603, 1375, 1213, 1036  $\text{cm}^{-1}$ .  $^1\text{H}$  NMR (400 MHz,  $\text{DMSO-d}_6$ ):  $\delta$  = 1.03 (s, 3H), 1.10 (s, 3H), 2.12-2.29 (m, 2H), 2.40-2.55 (m, 2H), 4.60 (s, 1H), 6.69 (brs, 2H), 6.86-6.88 (m, 2H), 7.16 (d,  $J$  = 3.6 Hz, 1H) ppm.

***2-amino-5-oxo-4-phenyl-5,6,7,8-tetrahydro-4H-chromene-3-carbonitrile (Table 3, entry 10)***

Yield 74%. Solid, m.p. 218°C. IR  $\nu_{\max}$  (KBr): 3324, 3261, 3170, 2193, 1683, 1651, 1364, 1210, 1001  $\text{cm}^{-1}$ .  $^1\text{H}$  NMR (400 MHz,  $\text{DMSO-d}_6$ ):  $\delta$  = 1.94-2.08 (m, 2H), 2.29-2.33 (m, 2H), 2.59-2.64 (m, 2H), 4.25 (s, 1H), 6.67 (brs, 2H), 7.14-7.19 (m, 3H), 7.24-7.28 (m, 2H) ppm.

***2-amino-4-(4-chlorophenyl)-5-oxo-5,6,7,8-tetrahydro-4H-chromene-3-carbonitrile (Table 3, entry 11)***

Yield 77%. Solid, m.p. 240°C. IR  $\nu_{\max}$  (KBr): 3415, 3334, 3215, 2196, 1685, 1650, 1601, 1247, 1003  $\text{cm}^{-1}$ .  $^1\text{H}$  NMR (400 MHz,  $\text{DMSO-d}_6$ ):  $\delta$  = 1.90-2.05 (m, 2H), 2.25-2.31 (m, 2H), 2.59-2.65 (m, 2H), 4.24 (s, 1H), 6.84 (brs, 2H), 7.17-7.20 (m, 2H), 7.25-7.29 (m, 2H) ppm.

***2-amino-4-(4-nitrophenyl)-5-oxo-5,6,7,8-tetrahydro-4H-chromene-3-carbonitrile (Table 3, entry 12)***

Yield 71%. Solid, m.p. 235°C. IR  $\nu_{\max}$  (KBr): 3417, 3336, 3217, 2196, 1682, 1651, 1601, 1362, 1006  $\text{cm}^{-1}$ .  $^1\text{H}$  NMR (400 MHz, DMSO- $d_6$ ):  $\delta$  = 1.97-2.09 (m, 2H), 2.31-2.35 (m, 2H), 2.62-2.69 (m, 2H), 4.42 (s, 1H), 6.79 (brs, 2H), 7.44 (d,  $J$  = 8.8 Hz, 2H), 8.13 (d,  $J$  = 6.8 Hz, 2H) ppm.

***2-amino-4-(4-bromophenyl)-5-oxo-4,5,6,7-tetrahydrocyclopenta[b]pyran-3-carbonitrile***

***(Table 3, entry 13)***

Yield 68%. Solid, m.p. 218°C. IR  $\nu_{\max}$  (KBr): 3409, 3325, 3210, 2195, 1673, 1639, 1599, 1369, 1011  $\text{cm}^{-1}$ .  $^1\text{H}$  NMR (400 MHz, DMSO- $d_6$ ):  $\delta$  = 2.43-2.45 (m, 2H), 2.72-2.80 (m, 2H), 4.24 (s, 1H), 6.86 (brs, 2H), 7.15-7.18 (m, 2H), 7.40-7.44 (m, 2H) ppm.

***2-amino-4-(4-chlorophenyl)-5-oxo-4,5,6,7-tetrahydrocyclopenta[b]pyran-3-carbonitrile***

***(Table 3, entry 14)***

Yield 70%. Solid, m.p. 214°C. IR  $\nu_{\max}$  (KBr): 3405, 3321, 3211, 2195, 1673, 1639, 1601, 1371, 1005  $\text{cm}^{-1}$ .  $^1\text{H}$  NMR (400 MHz, DMSO- $d_6$ ):  $\delta$  = 2.40-2.42 (m, 2H), 2.71-2.80 (m, 2H), 4.24 (s, 1H), 7.01 (brs, 2H), 7.21-7.24 (m, 2H), 7.28-7.31 (m, 2H) ppm.

***2-amino-5-oxo-4-(thiophen-2-yl)-4,5,6,7-tetrahydrocyclopenta[b]pyran-3-carbonitrile***

***(Table 3, entry 15)***

Yield 64%. Solid, m.p. 218°C. IR  $\nu_{\max}$  (KBr): 3383, 3316, 3202, 2192, 1665, 1647, 1592, 1376, 1094  $\text{cm}^{-1}$ .  $^1\text{H}$  NMR (400 MHz, DMSO- $d_6$ ):  $\delta$  = 2.41-2.46 (m, 2H), 2.67-2.77 (m, 2H), 4.57 (s, 1H), 6.85 (brs, 2H), 6.89-6.92 (m, 2H), 6.96 (d,  $J$  = 2.8 Hz, 1H), 7.20 (d,  $J$  = 2.8 Hz, 1H) ppm.

***Methyl 6-amino-5-cyano-2-methyl-4-phenyl-4H-pyran-3-carboxylate (Table 4, entry 1)***

Yield 84%. Solid, m.p. 175°C. IR  $\nu_{\max}$  (KBr): 3416, 3331, 3202, 2952, 2199, 1711, 1672, 1607, 1408, 1334, 1266, 1179, 1062  $\text{cm}^{-1}$ .  $^1\text{H}$  NMR (400 MHz,  $\text{CDCl}_3$ ):  $\delta$  = 2.46 (s, 3H), 3.63 (s, 3H), 4.53-4.59 (brs, 3H), 7.28-7.31 (m, 2H), 7.36-7.39 (m, 3H) ppm.



***Ethyl 6-amino-5-cyano-2-methyl-4-phenyl-4H-pyran-3-carboxylate (Table 4, entry 2)***

Yield 84%. Solid, m.p. 115°C. IR  $\nu_{\max}$  (KBr): 3408, 3329, 3224, 2969, 2191, 1705, 1676, 1608, 1328, 1262, 1121, 1061  $\text{cm}^{-1}$ .  $^1\text{H}$  NMR (400 MHz,  $\text{CDCl}_3$ ):  $\delta$  = 1.14-1.72 (m, 3H), 2.44 (s, 3H), 4.09-4.12 (m, 2H), 4.51-4.52 (m, 2H), 7.28-7.29 (m, 2H), 7.35-7.38 (m, 3H) ppm.

***Methyl 6-amino-4-(4-chlorophenyl)-5-cyano-2-methyl-4H-pyran-3-carboxylate (Table 4, entry 3)***

Yield 85%. Solid, m.p. 170°C. IR  $\nu_{\max}$  (KBr): 3411, 3331, 3204, 2950, 2199, 1707, 1677, 1611, 1409, 1341, 1269, 1178, 1066  $\text{cm}^{-1}$ .  $^1\text{H}$  NMR (400 MHz,  $\text{CDCl}_3$ ):  $\delta$  = 2.37 (s, 3H), 3.59 (s, 3H), 4.42 (s, 1H), 4.50 (s, 2H), 7.14 (d,  $J$  = 7.6 Hz, 2H), 7.27 (d,  $J$  = 7.2 Hz, 2H) ppm.

***Ethyl 6-amino-4-(4-chlorophenyl)-5-cyano-2-methyl-4H-pyran-3-carboxylate (Table 4, entry 4)***

Yield 83%. Solid, m.p. 170°C. IR  $\nu_{\max}$  (KBr): 3422, 3319, 3206, 2981, 2197, 1717, 1646, 1608, 1489, 1338, 1273, 1177, 1121  $\text{cm}^{-1}$ .  $^1\text{H}$  NMR (300 MHz,  $\text{CDCl}_3$ ):  $\delta$  = 1.12 (t,  $J$  = 7.2 Hz, 2H), 2.38 (s, 3H), 4.00-4.07 (m, 2H), 4.43 (s, 1H), 4.50 (s, 2H), 7.14 (d,  $J$  = 8.4 Hz, 2H), 7.27-7.29 (m, 2H) ppm

***Methyl 6-amino-4-(4-bromophenyl)-5-cyano-2-methyl-4H-pyran-3-carboxylate (Table 4, entry 5)***

Yield 86%. Solid, m.p. 130–132°C. IR  $\nu_{\max}$  (KBr): 3410, 3331, 3226, 2923, 2192, 1698, 1676, 1608, 1409, 1344, 1267, 1179, 1065  $\text{cm}^{-1}$ .  $^1\text{H}$  NMR (400 MHz,  $\text{DMSO-d}_6$ ):  $\delta$  = 2.39 (s, 3H), 3.57 (s, 3H), 4.49 (s, 1H), 6.63 (s, 2H), 7.41 (d,  $J$  = 8.4 Hz, 2H), 8.15 (d,  $J$  = 8.8 Hz, 2H) ppm.  $^{13}\text{C}$  NMR (100 MHz,  $\text{DMSO-d}_6$ ):  $\delta$  = 18.4, 38.6, 51.2, 56.7, 119.0, 123.4, 128.0, 146.3,

151.9, 157.9, 158.5, 165.4. Anal. Calcd for C<sub>15</sub>H<sub>13</sub>BrN<sub>2</sub>O<sub>3</sub>: C, 51.60; H, 3.75; N, 8.02;  
Found : C, 51.42; H, 3.64; N, 8.18

***Ethyl 6-amino-4-(4-bromophenyl)-5-cyano-2-methyl-4H-pyran-3-carboxylate (Table 4, entry 6)***

Yield 86%. Solid, m.p. 178°C. IR  $\nu_{\max}$  (KBr): 3411, 3329, 3224, 2981, 2195, 1698, 1670, 1609, 1486, 1369, 1265, 1181, 1072 cm<sup>-1</sup>. <sup>1</sup>H NMR (300 MHz, CDCl<sub>3</sub>):  $\delta$  = 1.12 (t,  $J$  = 7.2 Hz, 2H), 2.38 (s, 3H), 4.00-4.06 (m, 2H), 4.42 (s, 1H), 4.51 (s, 2H), 7.09 (d,  $J$  = 8.1 Hz, 2H), 7.42 (d,  $J$  = 8.1 Hz, 2H) ppm

***Methyl 6-amino-5-cyano-4-(4-methoxyphenyl)-2-methyl-4H-pyran-3-carboxylate (Table 4, entry 7)***

Yield 84%. Solid, m.p. 150°C. IR  $\nu_{\max}$  (KBr): 3425, 3336, 3207, 2951, 2196, 1725, 1676, 1607, 1409, 1342, 1262, 1177, 1059 cm<sup>-1</sup>. <sup>1</sup>H NMR (400 MHz, CDCl<sub>3</sub>):  $\delta$  = 2.35 (s, 3H), 3.59 (s, 3H), 3.78 (s, 3H), 4.39 (s, 1H), 4.48 (s, 2H), 6.82 (d,  $J$  = 9.2 Hz, 2H), 7.11 (d,  $J$  = 9.2 Hz, 2H) ppm

***Ethyl 6-amino-5-cyano-4-(4-methoxyphenyl)-2-methyl-4H-pyran-3-carboxylate (Table 4, entry 8)***

Yield 84%. Solid, m.p. 135°C. IR  $\nu_{\max}$  (KBr): 3407, 3332, 3203, 2977, 2191, 1707, 1648, 1608, 1411, 1335, 1262, 1175, 1060 cm<sup>-1</sup>. <sup>1</sup>H NMR (300 MHz, CDCl<sub>3</sub>):  $\delta$  = 1.12 (t,  $J$  = 7.2 Hz, 2H), 2.36 (s, 3H), 3.78 (s, 3H) 4.00-4.08 (m, 2H), 4.40 (s, 1H), 4.44 (s, 2H), 6.83 (d,  $J$  = 8.7 Hz, 2H), 7.12 (d,  $J$  = 8.7 Hz, 2H) ppm

***Methyl 6-amino-5-cyano-2-methyl-4-p-tolyl-4H-pyran-3-carboxylate (Table 4, entry 9)***

Yield 82%. Solid, m.p. 175°C. IR  $\nu_{\max}$  (KBr): 3410, 3332, 3204, 2954, 2191, 1707, 1674, 1609, 1407, 1343, 1266, 1063 cm<sup>-1</sup>. <sup>1</sup>H NMR (400 MHz, CDCl<sub>3</sub>):  $\delta$  = 2.30 (s, 3H), 3.36 (s, 3H), 3.59 (s, 3H), 4.41 (s, 1H), 4.43 (s, 2H), 7.08-7.17 (m 2H) ppm.

***Ethyl 6-amino-5-cyano-2-methyl-4-p-tolyl-4H-pyran-3-carboxylate (Table 4, entry 10)***

Yield 82%. Solid, m.p. 180°C. IR  $\nu_{\max}$  (KBr): 3412, 3331, 3227, 2981, 2198, 1707, 1689, 1610, 1331, 1262, 1179, 1062  $\text{cm}^{-1}$ .  $^1\text{H}$  NMR (300 MHz,  $\text{CDCl}_3$ ):  $\delta$  = 1.12 (t,  $J$  = 7.2 Hz, 2H), 2.31 (s, 3H), 2.36 (s, 3H), 4.00-4.07 (m, 2H), 4.41 (s, 1H), 4.43 (s, 2H), 7.06-7.09 (m, 4H) ppm

***Methyl 6-amino-5-cyano-2-methyl-4-(4-nitrophenyl)-4H-pyran-3-carboxylate (Table 4, entry 11)***

Yield 84%. Solid, m.p. 165–167°C. IR  $\nu_{\max}$  (KBr): 3399, 3328, 3202, 2956, 2204, 1707, 1672, 1644, 1521, 1340, 1274, 1178, 1057  $\text{cm}^{-1}$ .  $^1\text{H}$  NMR (400 MHz,  $\text{DMSO-d}_6$ ):  $\delta$  = 2.34 (s, 3H), 3.57 (s, 3H), 4.32 (s, 1H), 6.57 (s, 2H), 7.09 (d,  $J$  = 8.4 Hz, 2H), 7.42 (d,  $J$  = 8.4 Hz, 2H) ppm.  $^{13}\text{C}$  NMR (100 MHz,  $\text{DMSO-d}_6$ ):  $\delta$  = 18.3, 38.2, 51.2, 57.3, 106.7, 119.3, 119.9, 128.9, 131.1, 157.0, 158.4, 165.6. Anal. Calcd for  $\text{C}_{15}\text{H}_{13}\text{N}_3\text{O}_5$ : C, 57.14; H, 4.16; N, 13.33; Found : C, 57.08; H, 4.12; N, 13.44.

***Ethyl 6-amino-5-cyano-2-methyl-4-(4-nitrophenyl)-4H-pyran-3-carboxylate (Table 4, entry 12)***

Yield 82%. Solid, m.p. 175°C. IR  $\nu_{\max}$  (KBr): 3404, 3331, 3203, 2981, 2198, 1708, 1674, 1607, 1346, 1271, 1174, 1060  $\text{cm}^{-1}$ .  $^1\text{H}$  NMR (300 MHz,  $\text{CDCl}_3$ ):  $\delta$  = 1.11 (t,  $J$  = 7.2 Hz, 2H), 2.43 (s, 3H), 4.01-4.08 (m, 2H), 4.57 (s, 1H), 4.61 (s, 2H), 7.39 (d,  $J$  = 8.7 Hz, 2H), 8.19 (d,  $J$  = 8.4 Hz, 2H) ppm

***Methyl 6-amino-5-cyano-2-methyl-4-(3-nitrophenyl)-4H-pyran-3-carboxylate (Table 4, entry 13)***

Yield 82%. Solid, m.p. 210°C. IR  $\nu_{\max}$  (KBr): 3402, 3329, 3224, 2957, 2192, 1707, 1679, 1607, 1417, 1345, 1271, 1181, 1066  $\text{cm}^{-1}$ .  $^1\text{H}$  NMR (400 MHz,  $\text{CDCl}_3$ ):  $\delta$  = 2.42 (s, 3H), 3.61 (s, 3H), 4.58 (s, 2H), 5.29 (s, 1H), 7.46-7.59 (m, 2H), 8.04-8.12 (m, 2H) ppm.

***Ethyl 6-amino-5-cyano-2-methyl-4-(3-nitrophenyl)-4H-pyran-3-carboxylate (Table 4, entry 14)***

Yield 80%. Solid, m.p. 170°C. IR  $\nu_{\max}$  (KBr): 3404, 3328, 3221, 2989, 2194, 1702, 1645, 1603, 1440, 1347, 1270, 1179, 1061  $\text{cm}^{-1}$ .  $^1\text{H}$  NMR (400 MHz,  $\text{CDCl}_3$ ):  $\delta$  = 1.12 (t,  $J$  = 6.8 Hz, 2H), 2.42 (s, 3H), 4.04-4.08 (m, 2H), 4.58 (s, 1H), 4.62 (s, 2H), 7.49-7.58 (m, 2H), 8.05-8.08 (m, 2H) ppm

***Methyl 6-amino-5-cyano-2-methyl-4-(2-nitrophenyl)-4H-pyran-3-carboxylate (Table 4, entry 15)***

Yield 79%. Solid, m.p. 181–183°C. IR  $\nu_{\max}$  (KBr): 3459, 3331, 3208, 2951, 2205, 1728, 1628, 1605, 1529, 1431, 1227, 1073, 944  $\text{cm}^{-1}$ .  $^1\text{H}$  NMR (400 MHz,  $\text{DMSO-d}_6$ ):  $\delta$  = 2.37 (s, 3H), 3.46 (s, 3H), 5.07 (s, 1H), 6.64 (s, 2H), 7.37-7.41 (m, 2H), 7.61 (d,  $J$  = 7.6 Hz, 2H), 7.74 (d,  $J$  = 8.4 Hz, 1H) ppm.  $^{13}\text{C}$  NMR (100 MHz,  $\text{DMSO-d}_6$ ):  $\delta$  = 18.3, 32.6, 51.2, 56.5, 106.5, 118.7, 123.1, 127.4, 130.2, 132.8, 139.2, 148.7, 158.1, 158.9, 165.1. Anal. Calcd for  $\text{C}_{15}\text{H}_{13}\text{N}_3\text{O}_5$ : C, 57.14; H, 4.16; N, 13.33; Found : C, 57.10; H, 4.08; N, 13.48.

**Copies of  $^1\text{H}$  and  $^{13}\text{C}$  NMR spectra of Compound (Table 4, entry 5):**

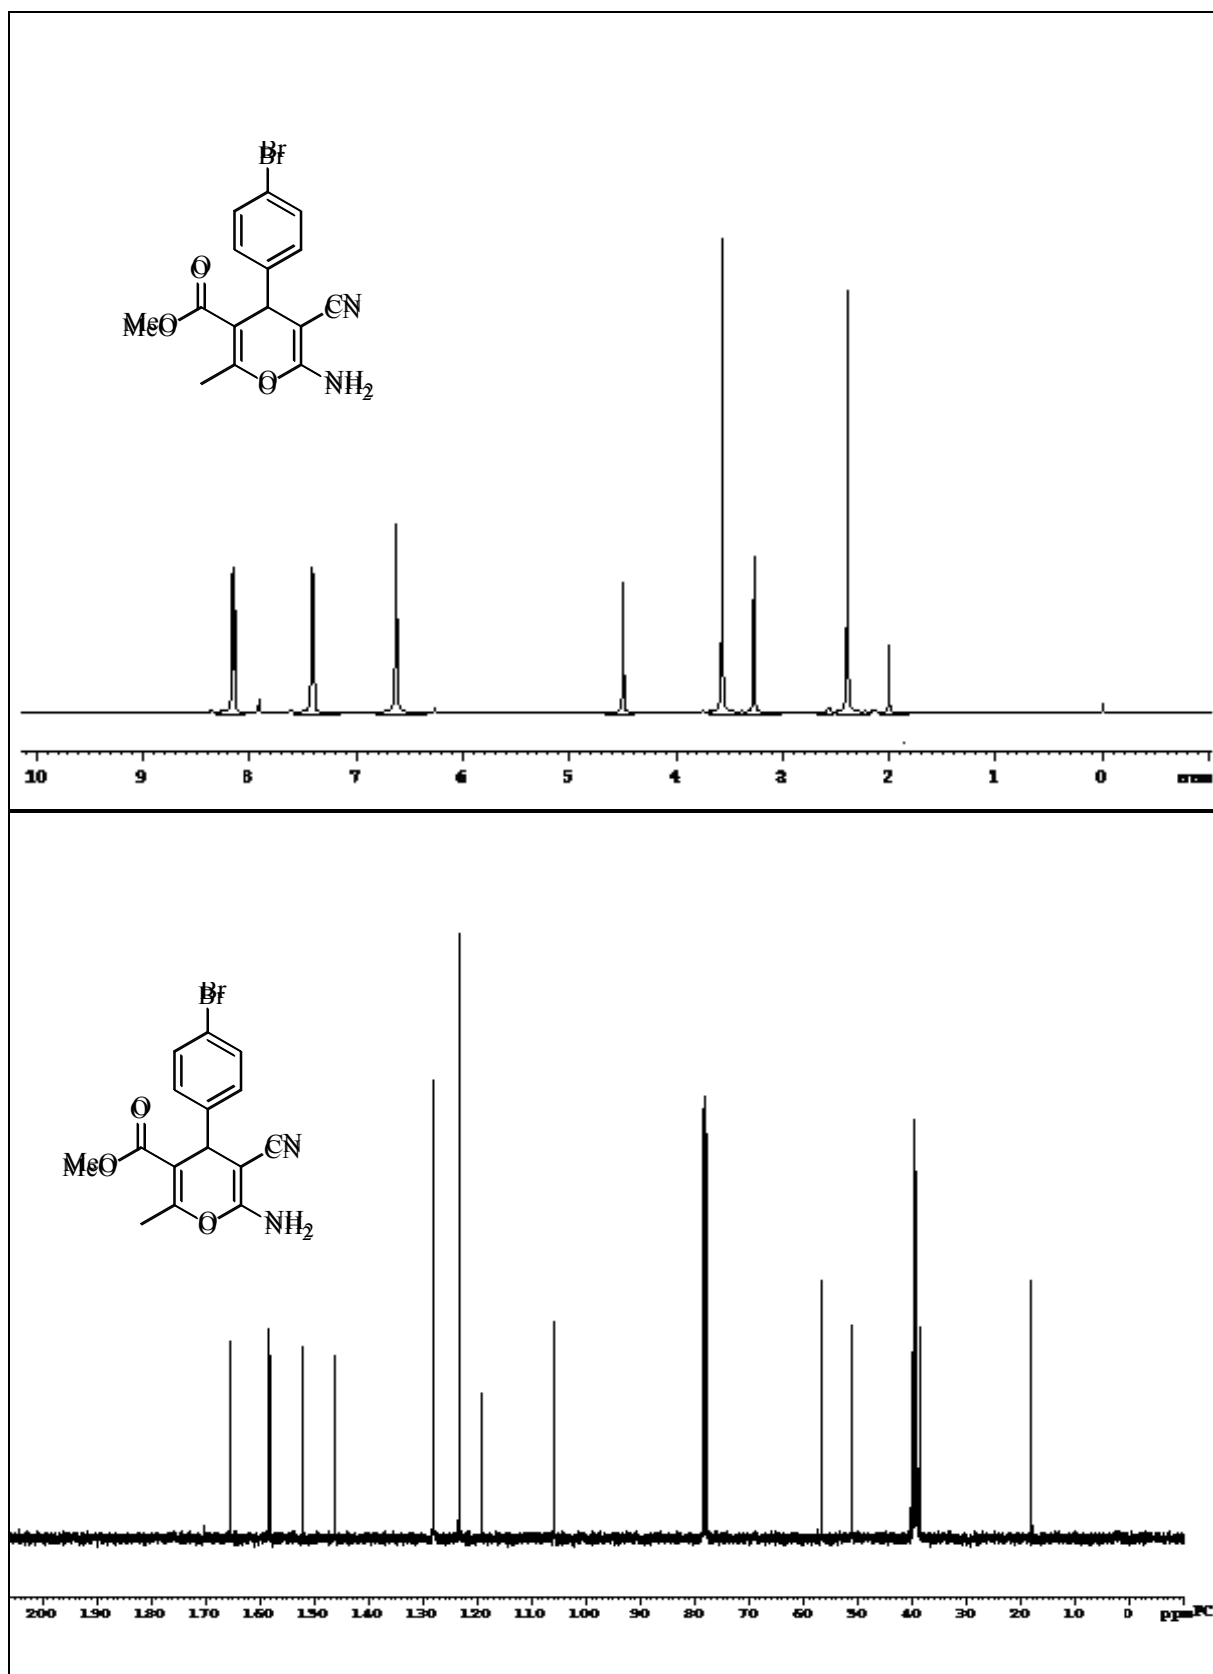

Copies of <sup>1</sup>H and <sup>13</sup>C NMR spectra of Compound (Table 4, entry 11):

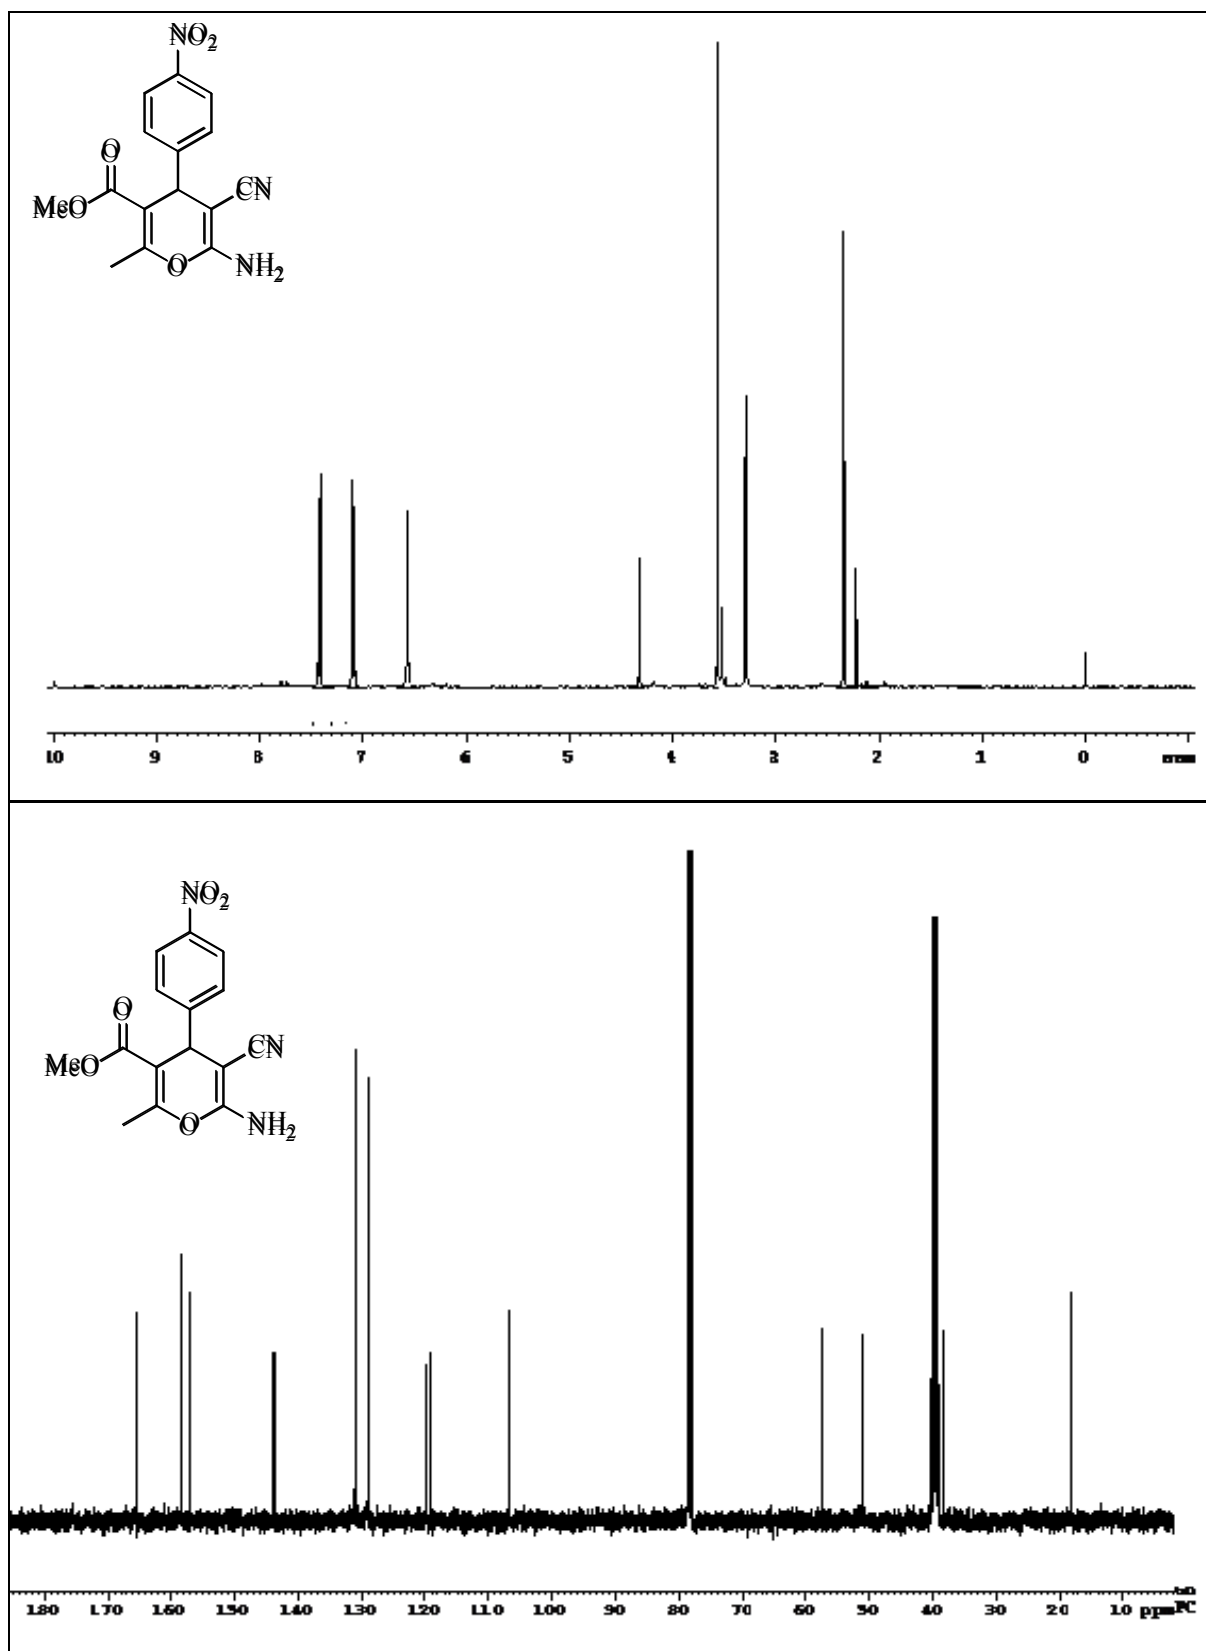

Copies of  $^1\text{H}$  and  $^{13}\text{C}$  NMR spectra of Compound (Table 4, entry 15):

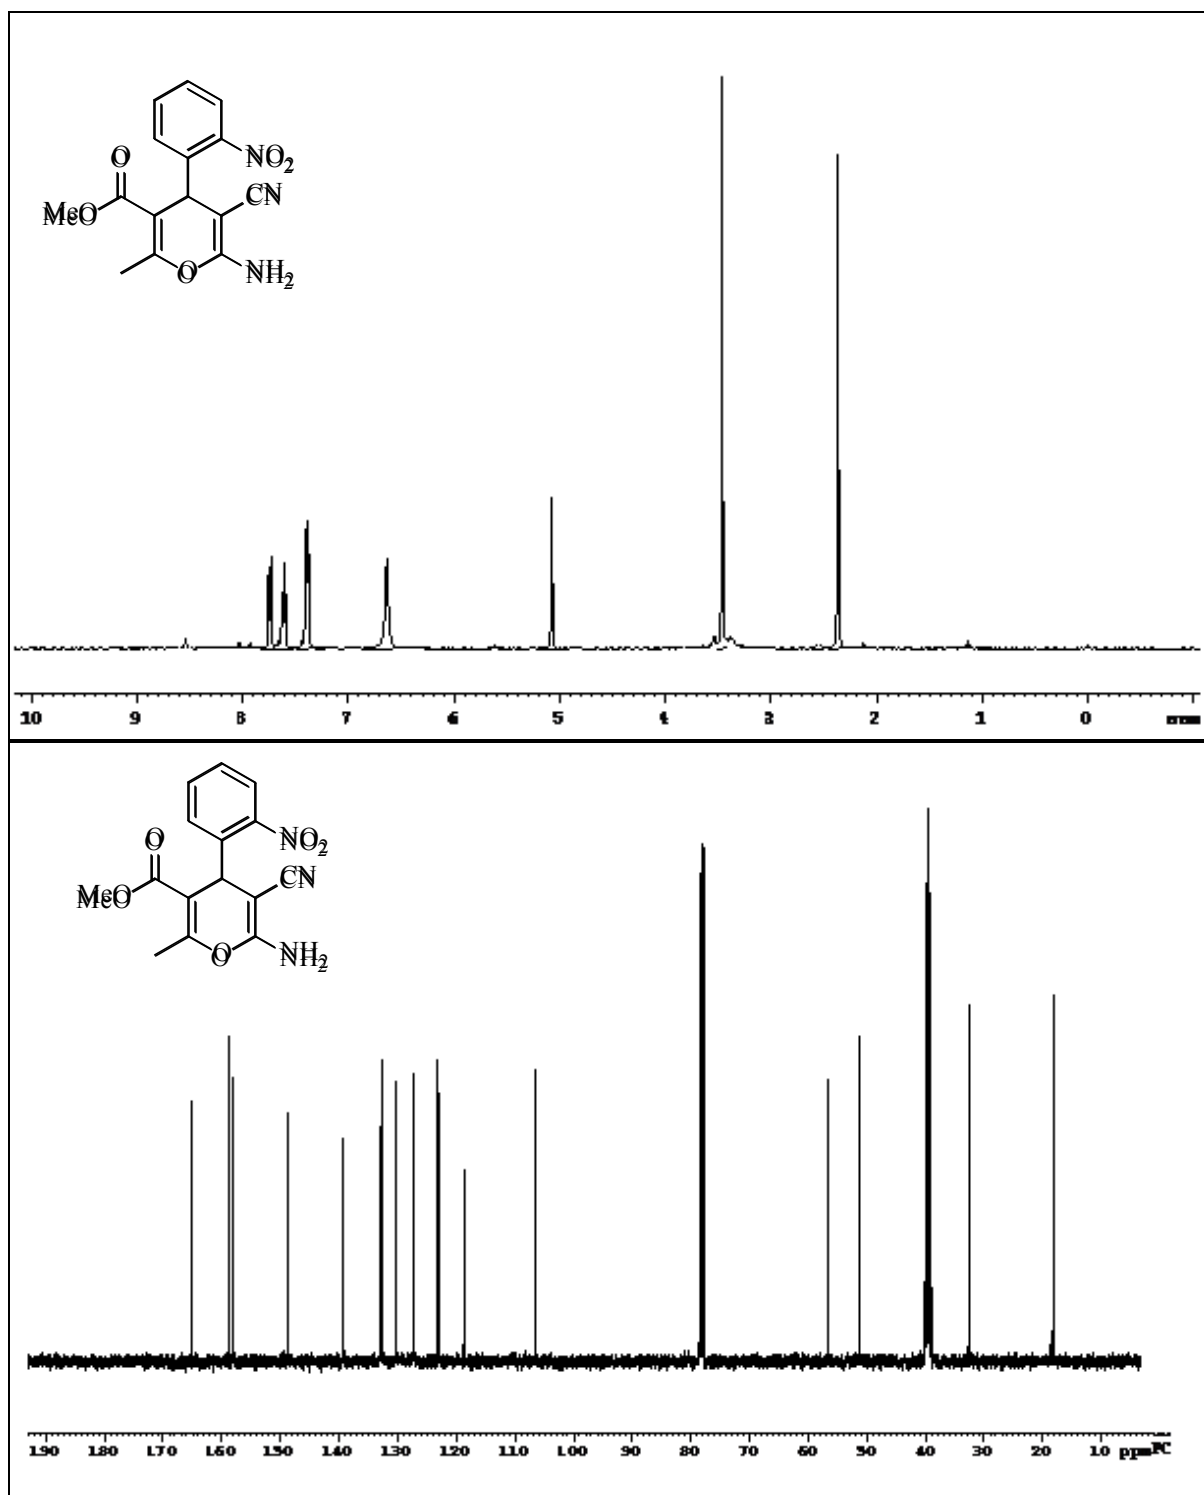

Supplement: c3ra43514h.pdf [file c3ra43514h.pdf]
